# Supplementary material for: Different superstructures formed by Janus-type nucleosides
Source: Royal Society of Chemistry journal article supplement (doi:10.1039/c2cc31036h), 2012-01-01
Supplement: c2cc31036h.pdf [file c2cc31036h.pdf]

## Supplementary Information for:

## Different Superstructures formed by Janus-type Nucleosides

Hang Zhao<sup>a,b</sup>, Wen Huang<sup>b</sup>, Xiaohua Wu<sup>b</sup>, Zhihua Xing<sup>b</sup>, Qianming Chen<sup>\*a</sup>  
and Yang He<sup>\*b</sup>

<sup>a</sup> State Key Laboratory of Oral Diseases, West China hospital of Stomatology, Sichuan University, No. 14, Section 3, Renminnan Road, Chengdu, Sichuan 610041, China

<sup>b</sup> Laboratory of Ethnopharmacology, Institute for Nanobiomedical Technology and Membrane Biology, Regenerative Medicine Research Center, West China Hospital, West China Medical School, Sichuan University, Chengdu 610041, China.

Tel: +86 2885164077; E-mail: heyangqx@yahoo.com.cn

### Abbreviations

DMF (N,N-dimethylformamide); H<sub>2</sub>O (deionized NanoPure water); MeOH (methanol); h (hour); Tapping mode atomic force microscopy (TM-AFM); SEM (scanning electron microscopy); TEM (transmission electron microscopy); ESI-MS (electrospray ionization mass spectrometry); CD (circular dichroism)

### General

The samples were prepared by dissolving (compound **1-3**, 1 mg/mL) in DMF. The solutions were heated to ~100°C and allowed to cool to room temperature for ~48 h, then investigated by SEM, AFM and TEM.

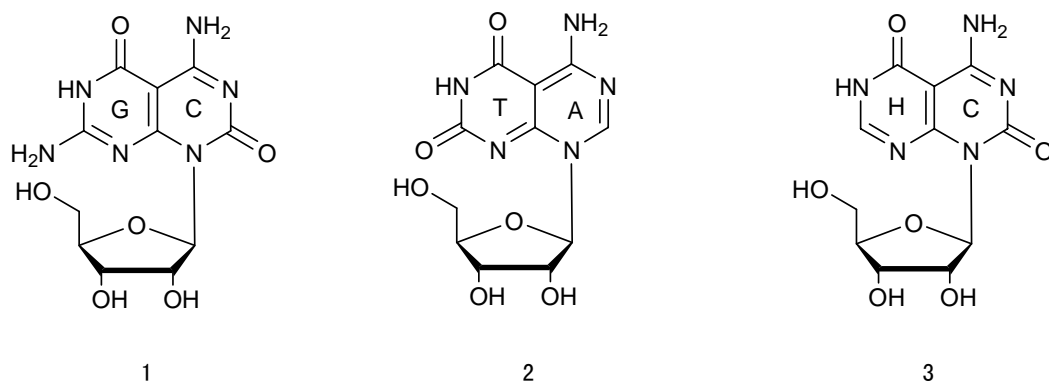

**Figure S1.** The structures of compound **1-3**.

## SEM Imaging

SEM was performed using a high resolution INSPECT F50. All SEM images were obtained without staining. Samples were prepared by dissolving (compound **1-3**, 1 mg/mL) in DMF. The solutions were heated to  $\sim 100^{\circ}\text{C}$  and allowed to cool to room temperature for  $\sim 48$  h.

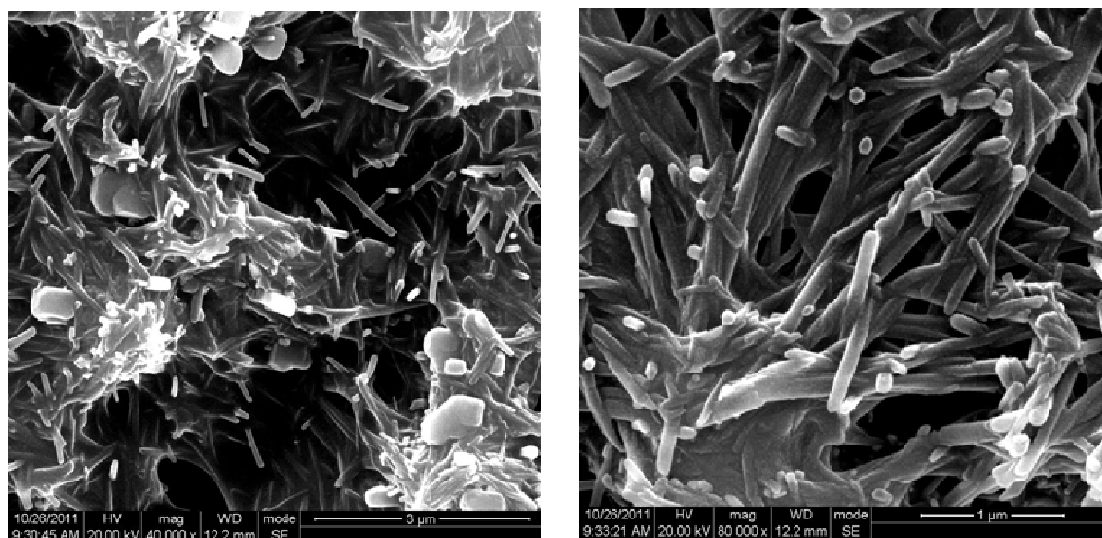

**Figure S2.** SEM images of compound **1** (1 mg/mL in DMF) recorded on INSPECT F50

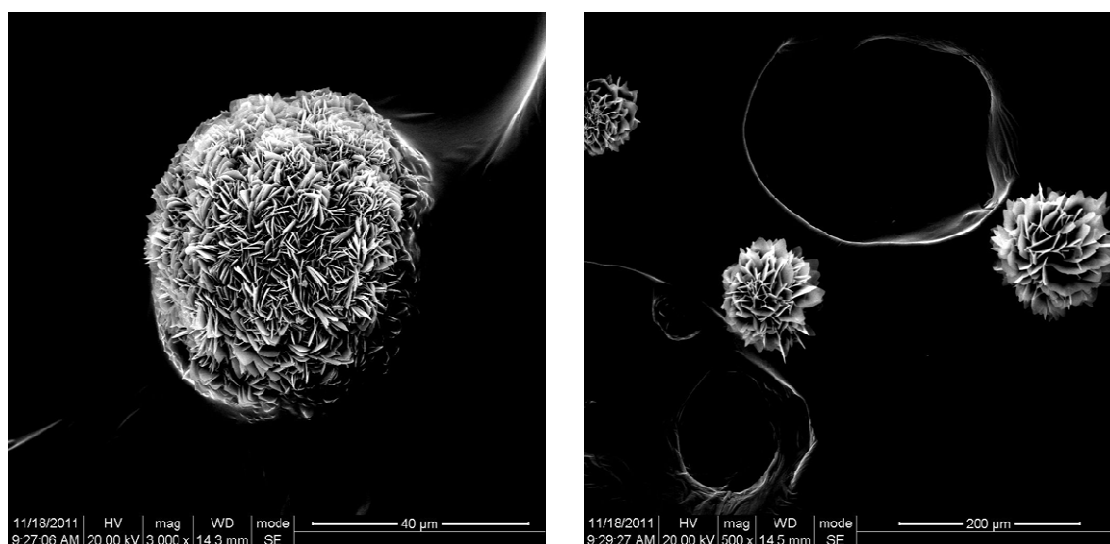

**Figure S3.** SEM images of compound **2** (1 mg/mL in DMF) recorded on INSPECT F50

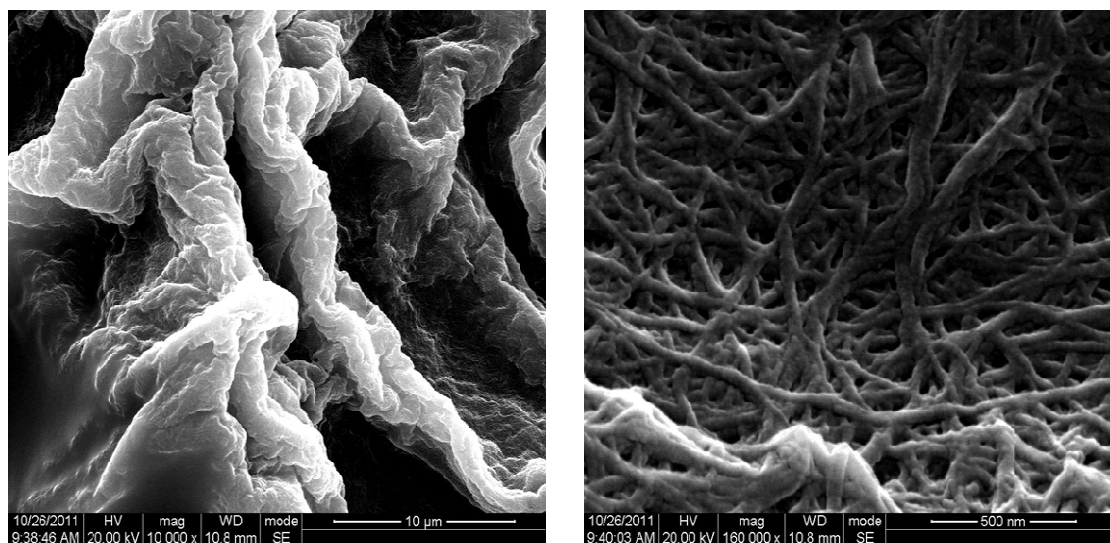

**Figure S4.** SEM images of compound **3** (1 mg/mL in DMF) recorded on INSPECT F50

## AFM Imaging

AFM measurements were performed in tapping mode (TM-AFM) at amplitude setpoint of 1 V using SPI4000 (Seiko Instruments, Chiba, Japan). Soft silicon cantilevers were chosen (SI-DF2000, K-A102001604, Japan) with spring constant of 5 N/m. Clean mica substrates ( $1 \times 1 \text{ cm}^2$ ) were prepared and 5 μL of the RNT samples (1 mg/mL in DMF) were deposited onto a freshly cleaved mica surface. The mica surface with the adsorbed samples was then dried in air and imaged immediately.

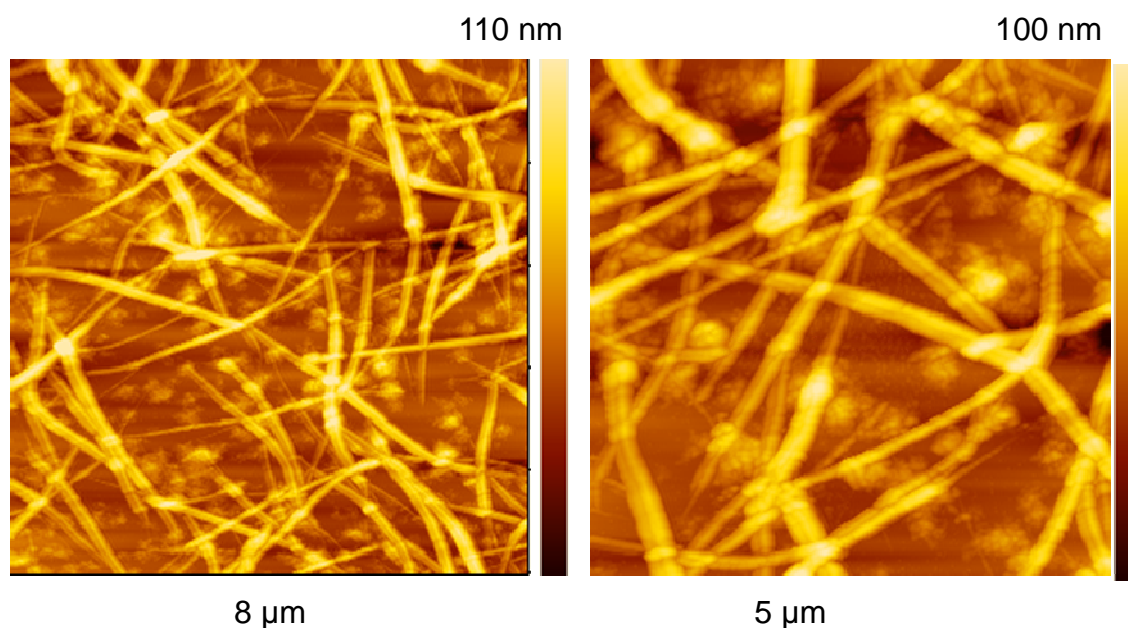

**Figure S5.** TM–AFM height and amplitude images of compound **1** (1 mg/mL in DMF).

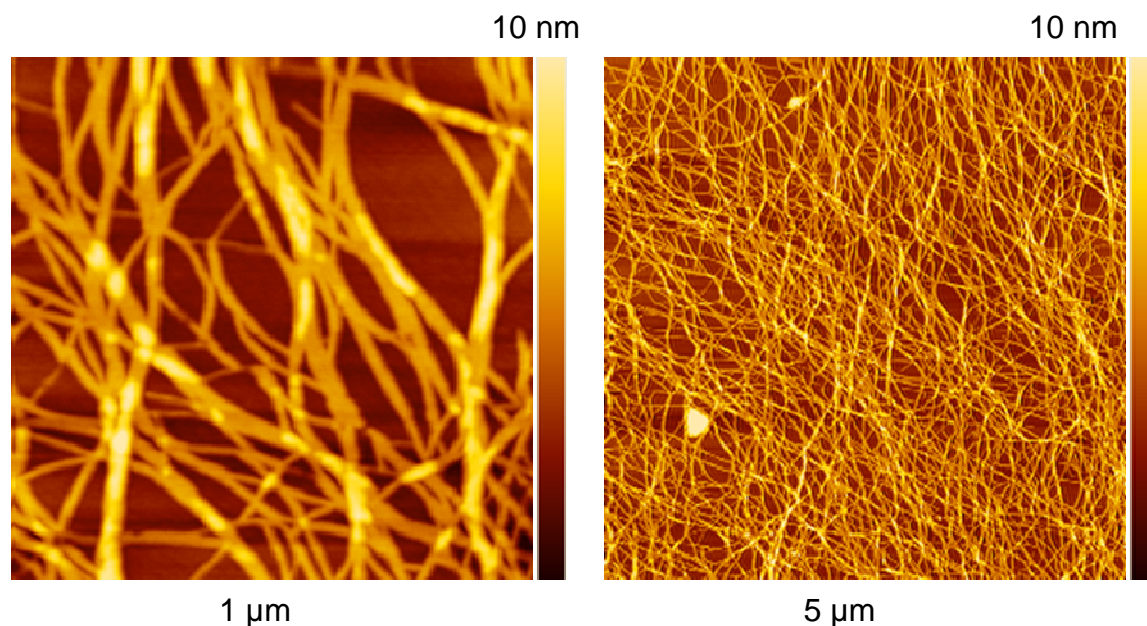

**Figure S6.** TM–AFM height and amplitude images of compound **3** (1 mg/mL in DMF).

### TEM Imaging

TEM images were recorded on a Tecnai G<sup>2</sup> F<sub>20</sub> microscope operated at 200KV, 5  $\mu$ L of each solution were placed on micro ultra-thin carbon coated TEM grid for 1 min before excess material was blotted with filter paper. All the samples were air-dried for 2 h at room temperature. The grids were staining with phosphotungstic acid and dried at room temperature before imaging.



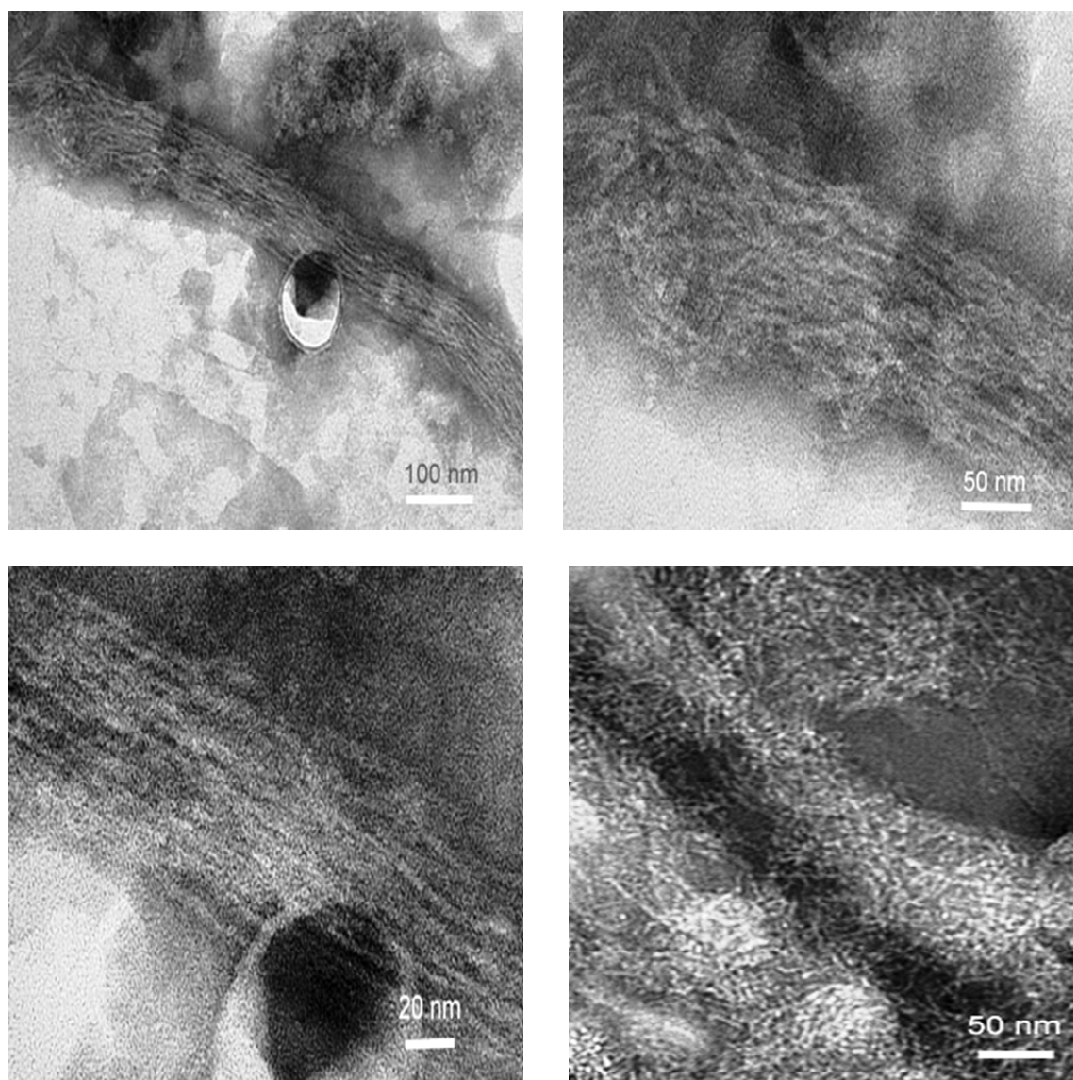

**Figure S7.** TEM images of compound 1

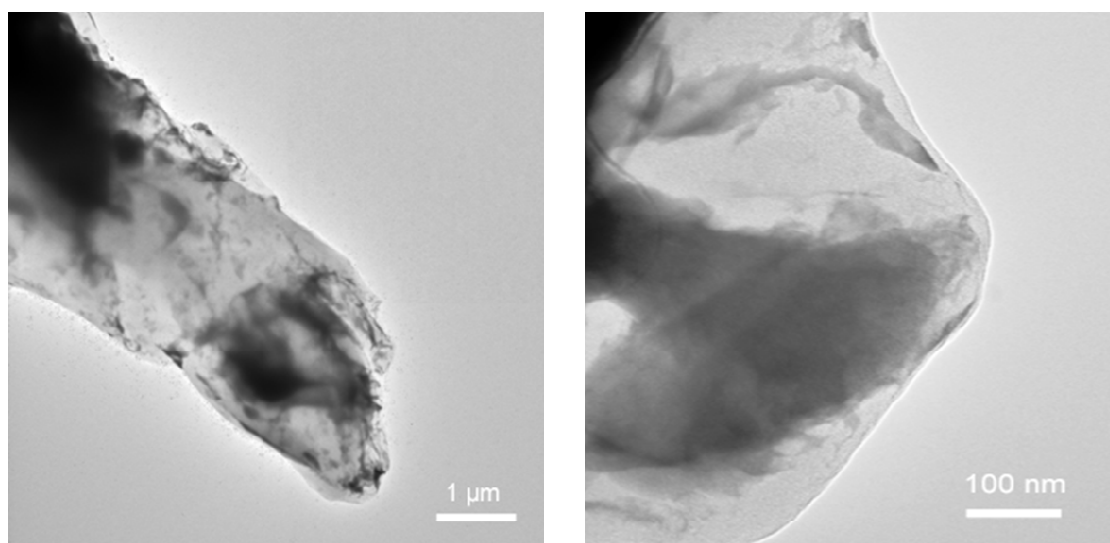

**Figure S8.** TEM images of compound 2

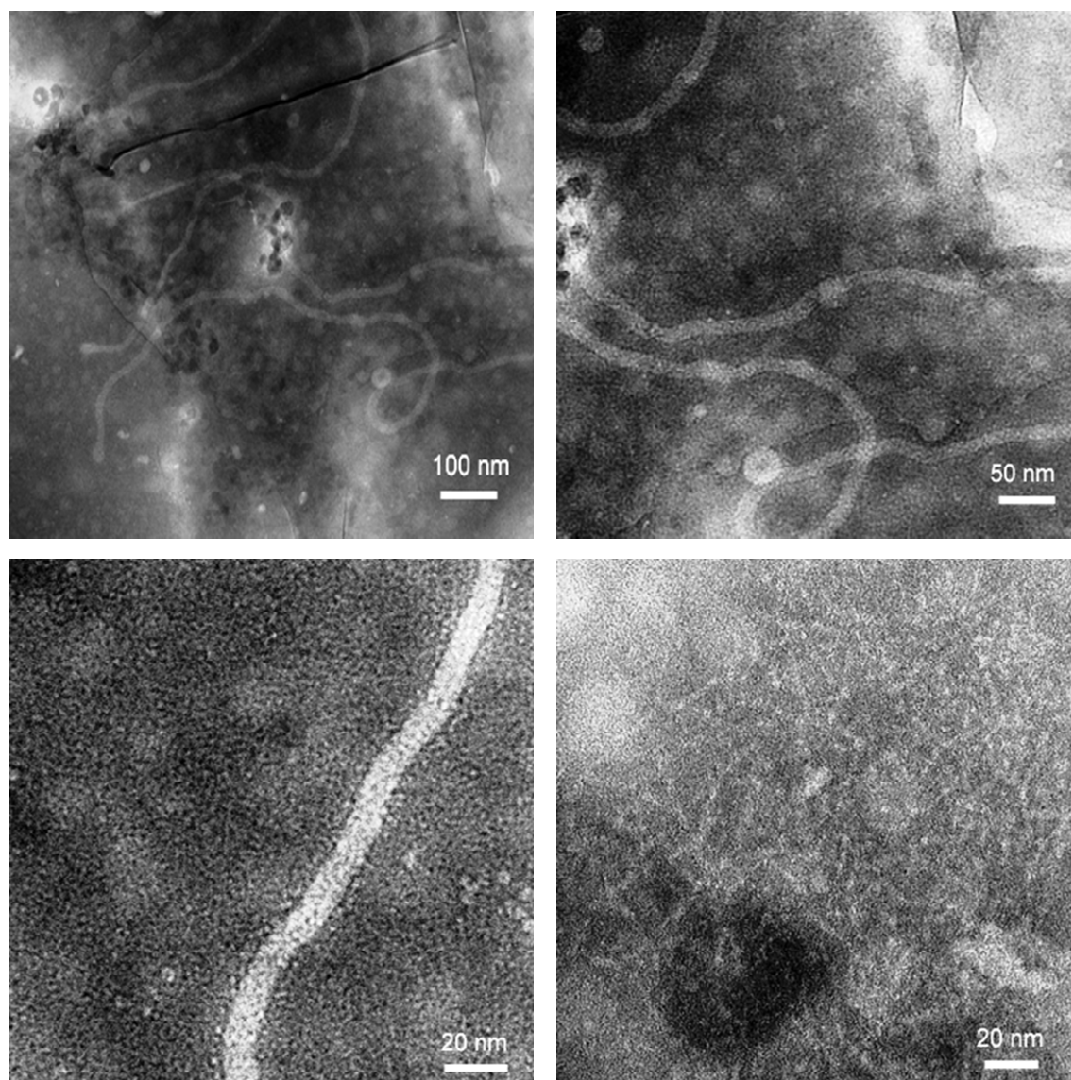

**Figure S9.** TEM images of compound **3**

### ESI-MS

MS data was got on ESI-Q-TOF (microTOF-Q) in the solution of **1** and **3** (0.1 mM in MeOH/H<sub>2</sub>O=1:1). The peaks correspond to the noncovalent intermediate species of the self-assembled supermacrocycle (1-mer to 6-mer)

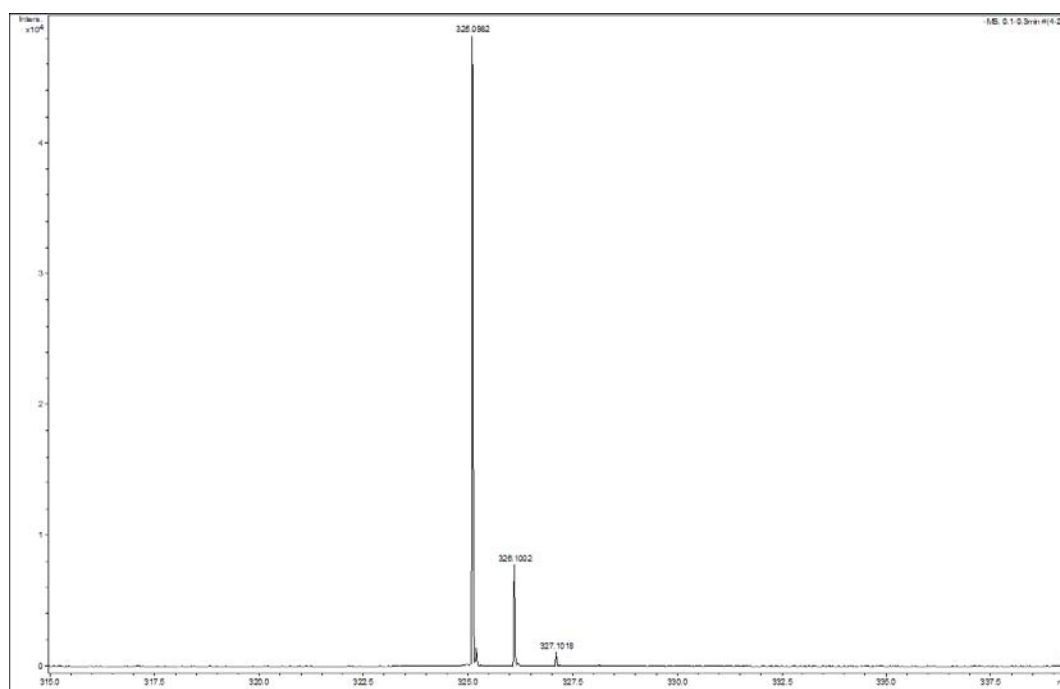

**Figure S10.** Compound **1** in MeOH/H<sub>2</sub>O (1:1) was investigated by negative ESI-MS mode, the 1-mer peaks at 325.09

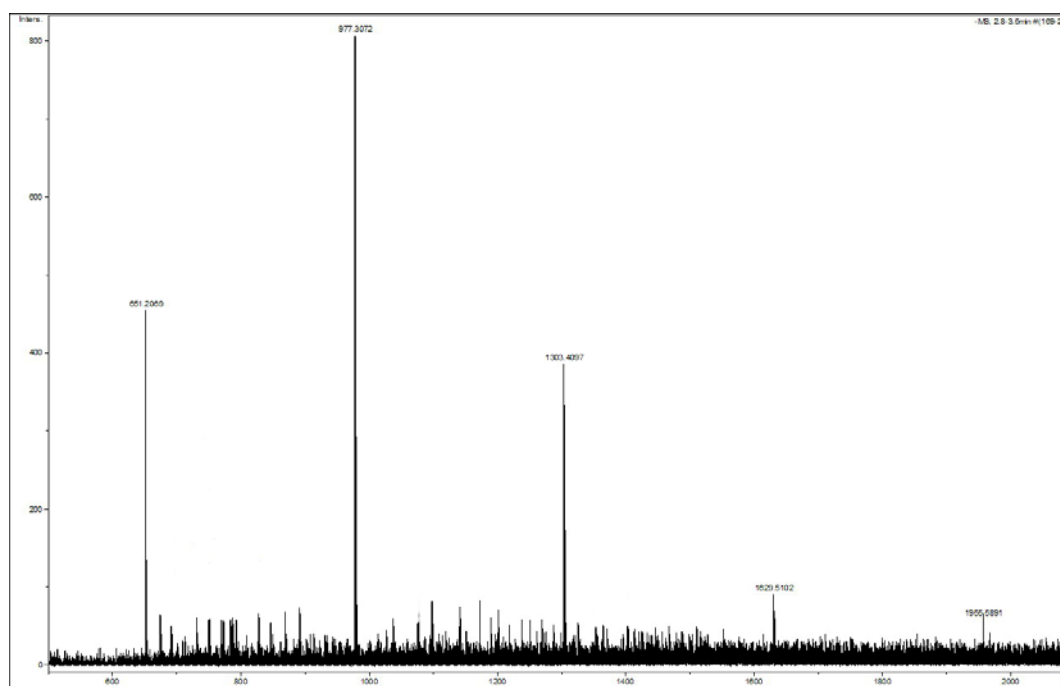

**Figure S11.** Compound **1** in MeOH/H<sub>2</sub>O (1:1) was investigated by negative ESI-MS mode, the 2-mer to 6-mer peaks at 651.21 to 1955.59.

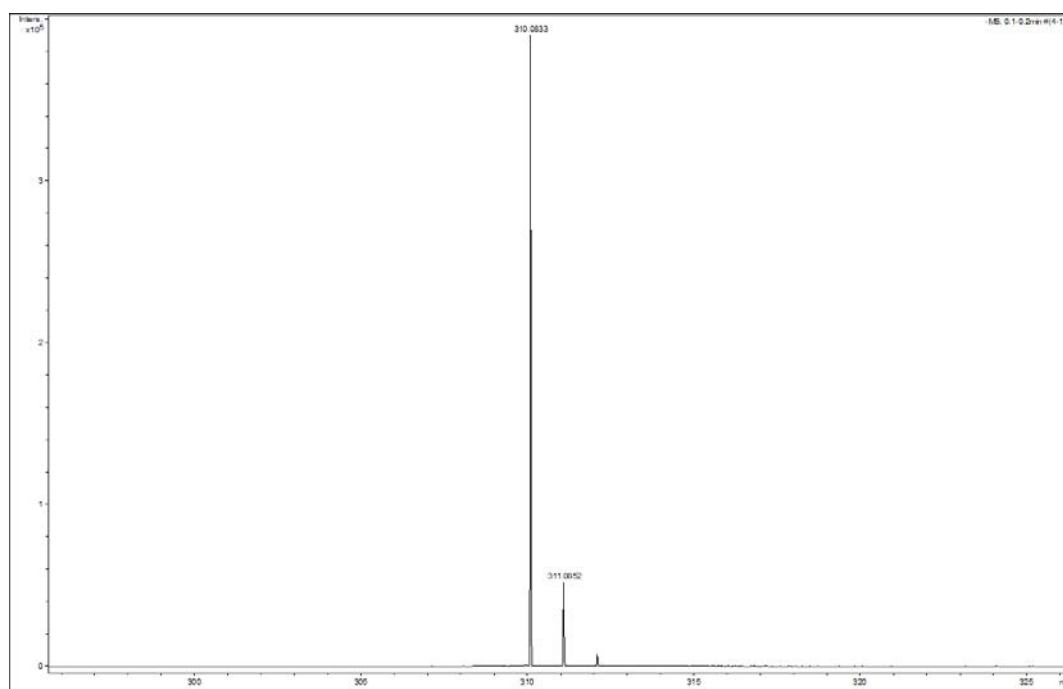

**Figure S12.** Compound **3** in MeOH/H<sub>2</sub>O (1:1) was investigated by negative ESI-MS mode, the 1-mer peaks at 310.08

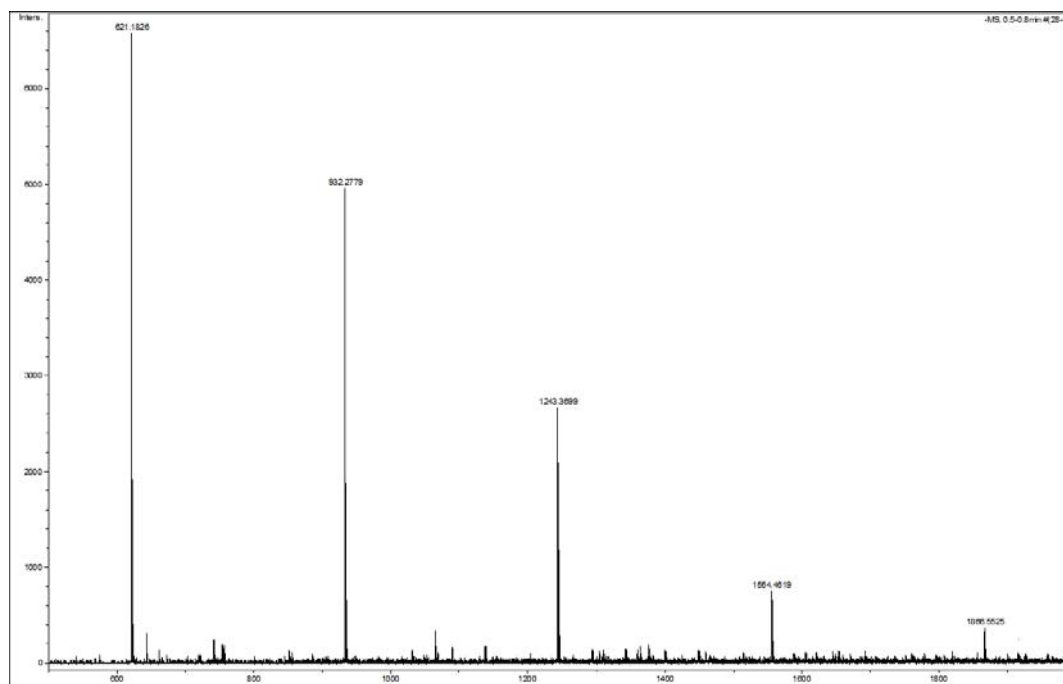

**Figure S13.** Compound **3** in MeOH/H<sub>2</sub>O (1:1) was investigated by negative ESI-MS mode, the 2-mer to 6-mer peaks at 621.18 to 1866.55.



## CD

CD spectra were recorded on circular dichroism spectrometer (Aviv Biomedical, Inc.). The samples were prepared by dissolving (compound **1** and **3**, 0.5 mg/mL) in H<sub>2</sub>O. The solutions were heated to ~90°C and allowed to cool to room temperature for ~48 h, then investigated by CD.

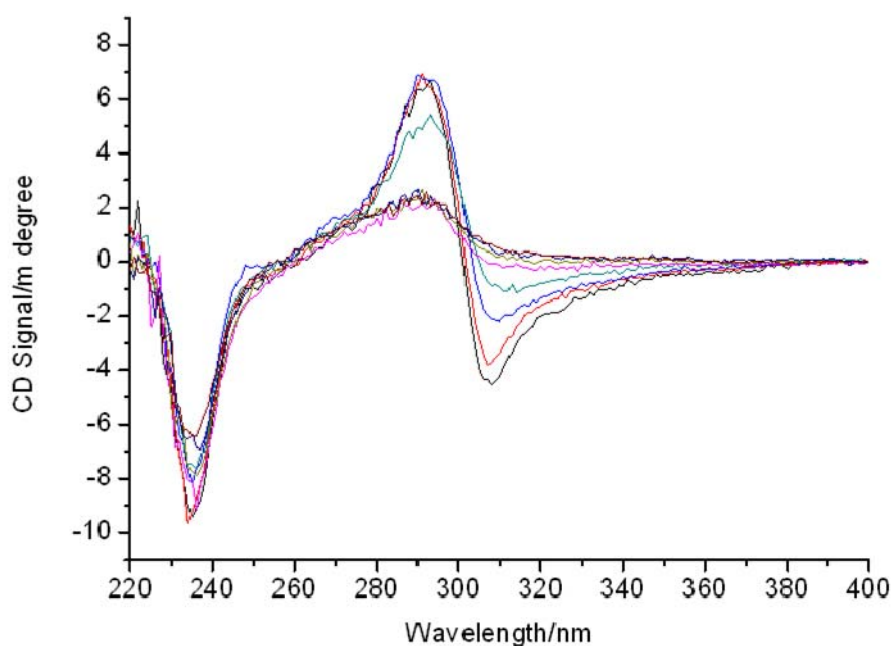

**Figure S14.** Temperature-dependent CD spectra of unbuffered aqueous solution for compound **1** (0.5 mg/mL in H<sub>2</sub>O), The arrow indicates the trend of temperature increasing: 10°C, 20°C, 30°C, 40°C, 50°C, 60°C, 70°C, 80°C; Wavelength start: 400 nm, wavelength end: 220 nm.

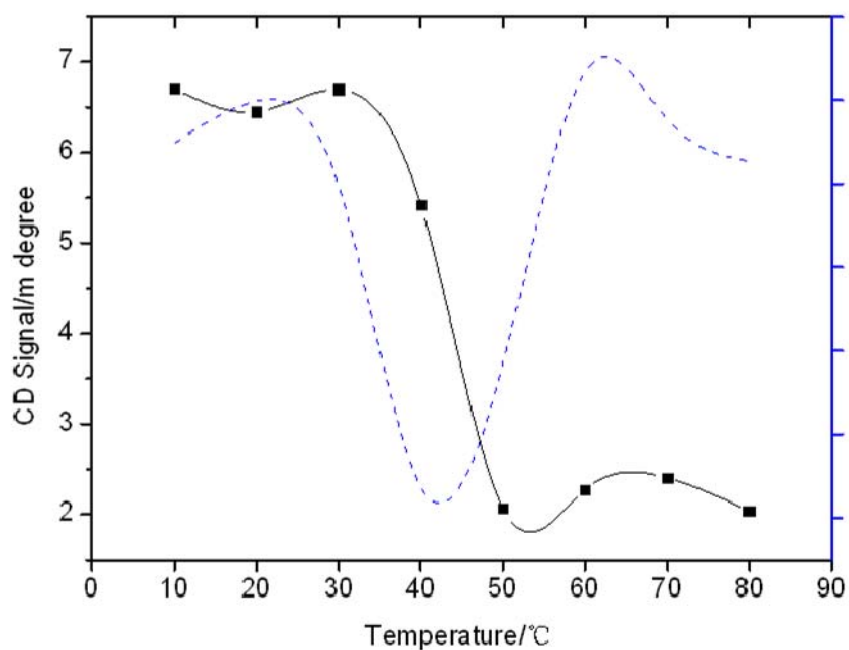

**Figure S15.** Temperature dependence of compound **1** at 293 nm.  $T_m$ : 42.5 °C.

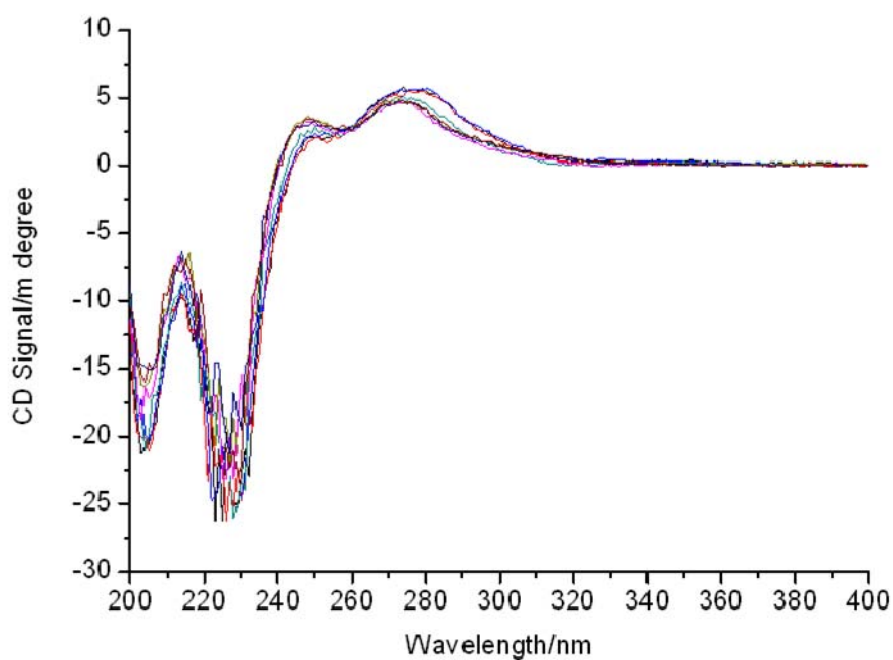

**Figure S16.** Temperature-dependent CD spectra of unbuffered aqueous solution for compound **3** (0.5 mg/mL in H<sub>2</sub>O), The arrow indicates the trend of temperature increasing: 10°C, 20°C, 30°C, 40°C, 50°C, 60°C, 70°C, 80°C; Wavelength start: 400 nm, wavelength end: 200 nm.
